# Supplementary material for: Re-analysing tobacco industry funded research on the effect of plain packaging on minors in Australia: Same data but different results
Source: PubMed Central journal article supplement — Tob Prev Cessat. 2017 Nov 16;3:130. doi: 10.18332/tpc/78508 (PMC7232792; doi:10.18332/tpc/78508), 2017-11-16
Supplement: TPC-3-130-s1.pdf [file TPC-3-130-s1.pdf]

Supplementary material to  
“Re-analysing tobacco-industry funded research on the effect of plain  
packaging on minors in Australia: same data, different results”

Reverse-engineering Kaul and Wolf’s figures  
to reconstruct the data on minors they used  
in their first working paper on plain packaging

P.A. Diethelm, OxyRomandie

## Description of the method

This supplementary document describes how Diethelm and Farley reconstructed the data used by Kaul and Wolf in their working paper on minors.<sup>1</sup> It is believed that the (original) method presented below has made it possible to reconstruct the data with 100% accuracy. The method consists in a number of steps, which will be documented in detail. The computer program used in the fourth step is shown in Annex 1 and the reconstructed data is shown in Annex 2. The same procedure was used to reconstruct the data on adults in a previously published paper.

### **Step 1.** Extracting the images from Kaul and Wolf’s paper

Kaul and Wolf’s working paper on minors is in PDF format and can be downloaded from the website of the University of Zürich. The figures showing the time series plot of the monthly sample sizes (Figure 1 in the paper) and of observed prevalence (Figure 2 in the same paper) were apparently produced using the R statistical package. We used these two figures to extract the data on sample size and prevalence. We first read the working paper into Adobe Acrobat Reader and accessed the page containing Figures 1 and 2 (on page 12). We took a snapshot of each figure using Acrobat’s snapshot function and “printed” it to a PDF file, producing files **prevalence.pdf** and **sample-size.pdf**.

### **Step 2.** Pre-processing the images in Photoshop

---

<sup>1</sup> Kaul A and Wolf M. The (Possible) Effect of Plain Packaging on the Smoking Prevalence of Minors in Australia: A Trend Analysis. University of Zurich Department of Economics Working Paper Series. May 2014; Available from <http://www.econ.uzh.ch/static/workingpapers.php?id=828>

We read each PDF file produced at Step 1 into Photoshop, specifying a *very high resolution* of **2400 pixels per inch** (producing a *very large image* of about 26,000 x 20,000 pixels). The following picture shows how the image for prevalence looked like in Photoshop:

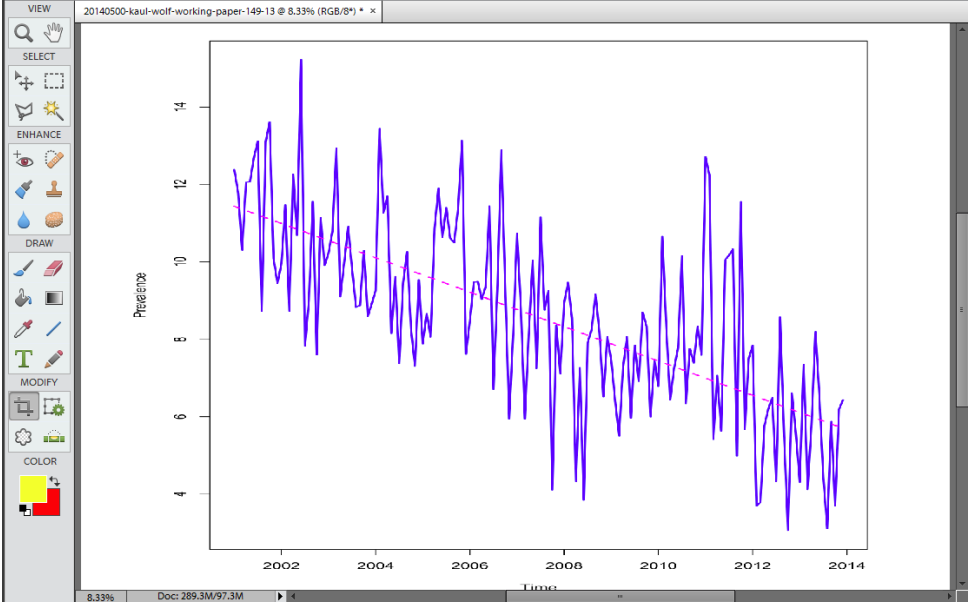

With Photoshop, we modified the colour of the prevalence (and sample size) line, made of various shades of blue (by “anti-aliasing”). We replaced all these shades of blue with a 100% pure red with no anti-aliasing. The enlarged before-and-after details below illustrate this step.

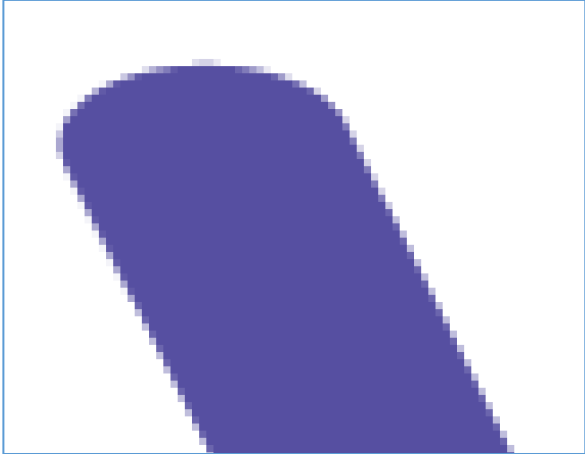

Before

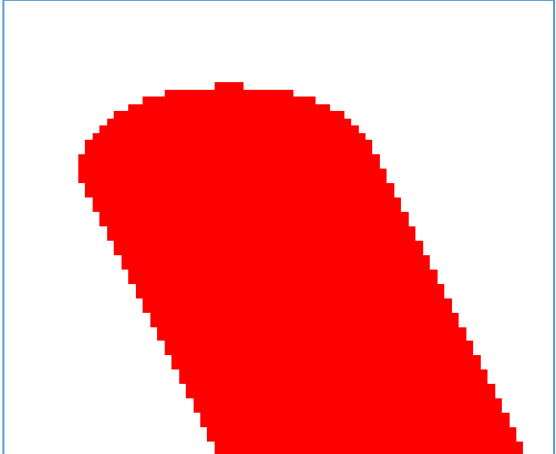

After

Before performing this step, we made sure pure red - colour `rgb(255,0,0)` - was not already used in the picture. The purpose of this step was to obtain a good contrast between the red line and its

white background in order to facilitate the identification of the edge pixels of the line by the `image2data.py` computer program described below.

### Step 3. Identifying key points on the images with yellow pixels

Still processing each figure in Photoshop, we also made that there was no pure yellow - `rgb(255,255,0)` - pixel in the image. We then painted a *single pure yellow pixel* at four particular places, as shown in the illustration below:

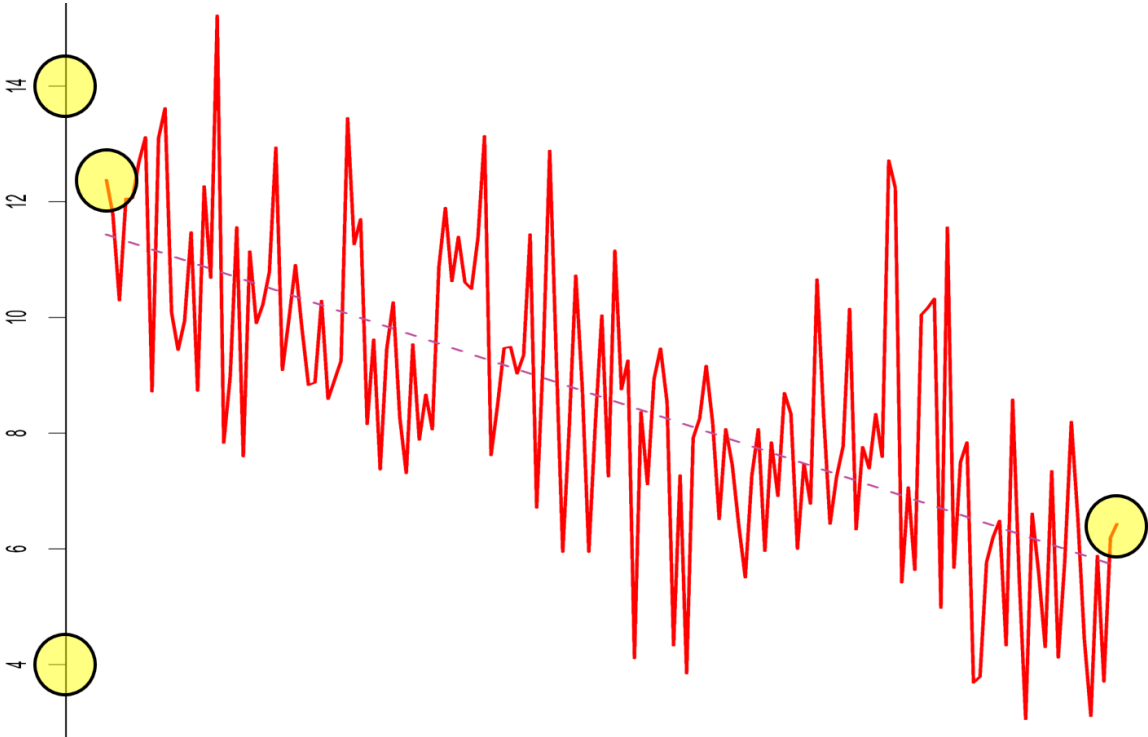

Two yellow pixels were painted on the vertical axis, as shown below. The pixels were be put at the middle point of the highest and lowest tick marks:

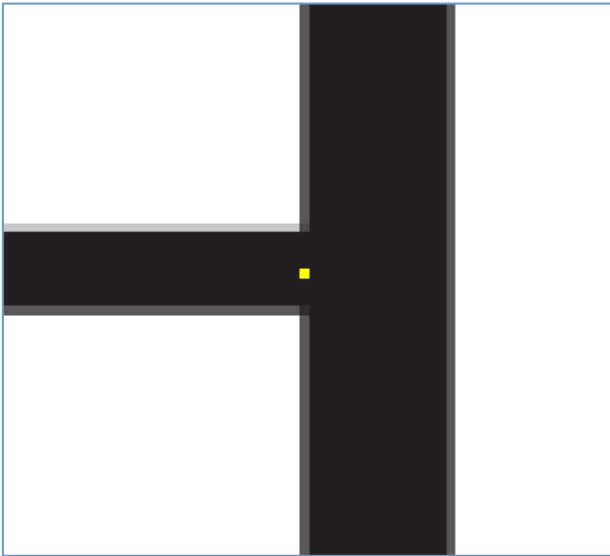

The other two yellow pixels were used to identify the starting point and the ending points of the plotted line. The pixels at the start and end of the plot line were placed as shown in the following picture, in a way to approximate as best as possible the actual starting and ending points of the underlying line.

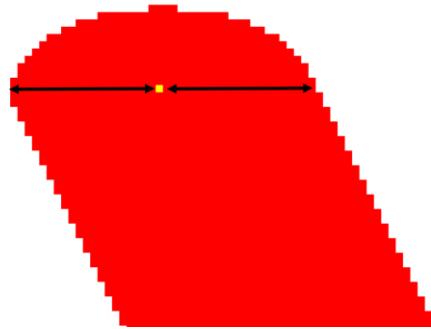

We saved the image thus obtained for each figure in JPEG format with the highest quality (12), under file names `prevalence.jpg` and `sample-size.jpg`.

#### **Step 4.** Running Python program `image2data.py`

We ran Python program `image2data.py` which we wrote specifically to treat the above images (see Annex 1). For each image file, 5 parameters were specified: two for the y-values corresponding to the yellow pixels on the vertical axis (corresponding respectively to the lowest and highest tick marks), two for the x-values associated with the pixels put at the start and end of the plot line (normally 1 and 156, since the plot starts at month 1 and ends at month months 156) and one specifying the number of points (156). The parameters were as follows for Figure 1 and Figure 2.

Figure 1 (sample size): 200, 350, 1, 156, 156

Figure 2 (prevalence): 4, 14, 1, 156, 156

The Python program calculates the data values by fitting straight lines on the edge pixels of the plot. For each line segment between two adjacent point, the program identifies the *left* edge pixels and the *right* edge pixels and fits a straight line by least square regression (if the line segment is more horizontal than vertical, the *top* and *bottom* edge pixels are used instead of the left and right edge pixels). Two lines are thus obtained – shown as dashed lines in the illustration below -, a left line and a right line (or a top line and a bottom line). The program then calculates the middle line between these two lines and assumes that this was the line representing the segment joining the two points - if the left line is  $ax + b$  and the right line is  $cx + d$ , the middle line will be given by  $\frac{1}{2}(a + c)x + \frac{1}{2}(b + d)$ . The data points which we are looking for are assumed to lie at the intersection of adjacent segments, as shown in the picture (surrounded by the green circle).

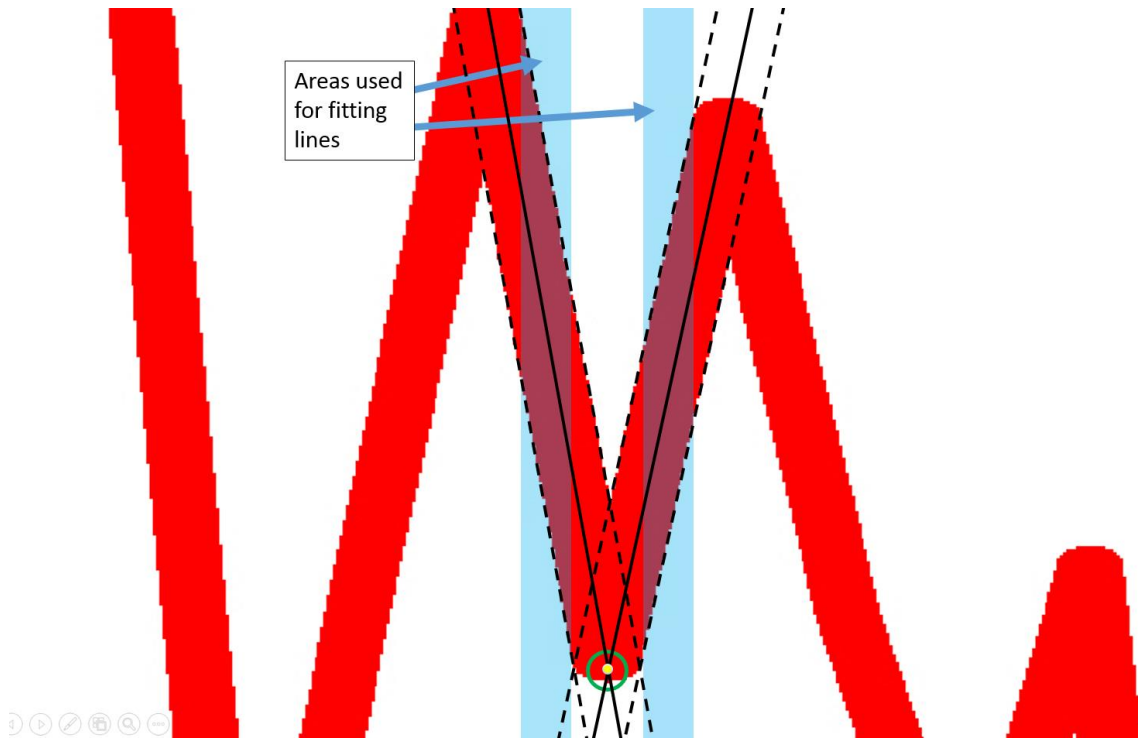

Using the Python program, we created two data files, **sample-size.txt** and **prevalence.txt** (in tab delimited text format), one containing the estimated values of sample sizes, the other containing the estimated values of observed monthly prevalence. These values were produced with high precision (10 significant digits).

**Step 5.** Assembling the data produced by program `image2data.py`

The two data files (**sample-size.txt** and **prevalence.txt**) produced by program **image2data.py** were then assembled into a single Excel file, with three columns, **time** (with values 1 to 156), **prev** and **size**. Steps 6-7 below were performed in Excel on the joined data.

**Step 6.** Assessing the accuracy of the resulting approximations

**Sample size data:** When working on Figure 1 (sample size), the y-coordinate of the data points obtained by the above method approximates the number of observations, which are *whole numbers*. We assumed that if our results were close to whole numbers, this indicated that the approximation was good and that probably many of the actual numbers of monthly observations were reconstructed exactly. See below the histogram of the difference between our approximations of sample sizes and the nearest whole number:

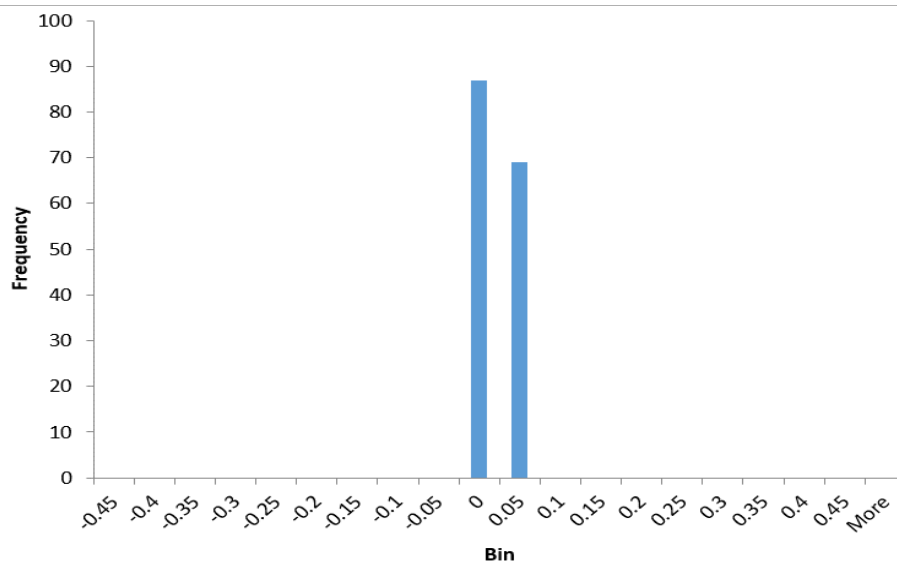

One can see that indeed there was a concentration of this difference around zero: all points are inside the range  $[-0.05, 0.05]$ .

We rounded the values produced by the Python program to the nearest whole numbers, thus obtaining the reconstructed sample sizes.

**Prevalence data:** We worked on Figure 2 to reconstruct the values of estimated monthly prevalence. We then assumed that the original observed prevalence data used by Kaul and Wolf were obtained by dividing the number of smokers in the monthly samples by the corresponding number of observations (sample size). We made the following reasoning: if we take the approximate prevalence values produced by our program and multiply them by the approximated sample sizes, we get an approximation of the number of smokers in the monthly sample. That is, we get a value which, if accurate, should be very close to a *whole number*. Therefore, looking at the difference between the approximated values of the number of smokers we obtained and the nearest integer provided us with an indication of the accuracy of our approximations. See below the histogram of the differences between our approximations of the number of smokers and the nearest whole number:

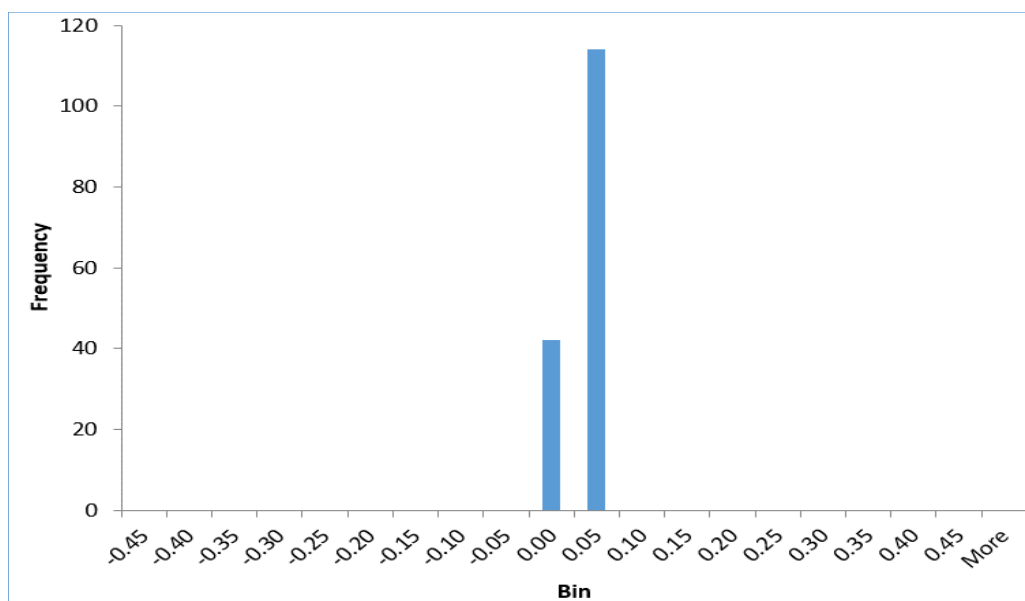

One can see again that there was a concentration of this difference around zero: all points are inside the range  $[-0.05, 0.05]$ . This is indicative of a high level of accuracy of the prevalence estimates produced by the Python program.

From these prevalence estimates we obtained more accurate values by taking instead the numbers of smokers (whole numbers) which they imply divided by the sample sizes.

With this last operation, we assumed that we able to reconstruct the data with 100% accuracy. A few more checks were performed to validate this assumption.

### **Step 7.** Further checks

We first observed that the sum of the monthly sample sizes which we reconstructed was identical to the total sample size indicated by Kaul and Wolf in their paper on minors (41,438). If there are errors in the reconstructed sample sizes, they must cancel each other out. This is very unlikely ( $p < 0.01$ ): it would mean that an erroneous reconstructed sample size, which would be very close to a wrong whole number, would have to be cancelled by another reconstructed sample size similarly close to a wrong whole number, but with a difference in the opposite direction.

Secondly, using the reconstructed data, we were able to reproduce exactly Kaul and Wolf regression results presented in Table 1 of their paper:

|                    |                      |
|--------------------|----------------------|
| (Intercept)        | 11.471***<br>(0.270) |
| $t$ (Month)        | -0.037***<br>(0.003) |
| $R^2$              | 0.46                 |
| Adjusted $R^2$     | 0.46                 |
| Sample size        | 156                  |
| Degrees of freedom | 154                  |

\*\*\* $p < 0.001$ , \*\* $p < 0.01$ , \* $p < 0.05$

Table 1: Regression output for the fitted model (3.2). The numbers in parentheses below the estimated coefficients are corresponding standard errors.

This is the output produced by R when running the same analysis using the reconstructed data:

```
Call:
lm(formula = prev ~ time, weights = size)

Weighted Residuals:
    Min      1Q  Median      3Q     Max
-64.072 -21.267   0.843  16.145  86.223

Coefficients:
              Estimate Std. Error t value Pr(>|t|)
(Intercept) 11.471386   0.269965   42.49  <2e-16 ***
time        -0.036978   0.003223  -11.47  <2e-16 ***
---
Signif. codes:  0 '***' 0.001 '**' 0.01 '*' 0.05 '.' 0.1 ' ' 1

Residual standard error: 29.45 on 154 degrees of freedom
Multiple R-squared:  0.4608,    Adjusted R-squared:  0.4573
F-statistic: 131.6 on 1 and 154 DF,  p-value: < 2.2e-16
```

This is a further indication that we were able to reconstruct the data used by Kaul and Wolf in their first working paper with 100% accuracy, or that, at any rate, performing the analysis with our reconstructed data will produce results which are undistinguishable from the results produced with the real data.

2017.08.29/pad



## Annex 1. Python code of program `image2data.py`

```
# -*- coding: utf-8 -*-
#
# Obtaining data by reverse engineering from published figures
#
# Author: Pascal Diethelm, 12.09.2016

PARM = [
    ['sample size', 'sample-size.png', 'sample-size.txt', 200, 350, 1, 156, 156],
    ['prevalence', 'prevalence.png', 'prevalence.txt', 4, 14, 1, 156, 156]
]

# Imports -----

import os
chdir = os.chdir
import scipy
from scipy import stats
import PIL
from PIL import Image

# Constants -----

DIR = '.' # Work directory (change to directory where images are stored)
MARGIN = 0.33 # Margin around exact x-values defining vertical band considered for
fitting line

# Functions -----

def is_yellow(x,y) :
    pix = PX[x,y]
    return (pix[0] >= 200 and pix[1] >= 200 and pix[2] <= 50)
def is_red(x,y) :
    pix = PX[x,y]
    return (pix[0] >= 200 and pix[1] <= 50 and pix[2] <= 50)
def is_white(x,y) :
    pix = PX[x,y]
    return (pix[0] >= 200 and pix[1] >= 200 and pix[2] >= 200)

def process_image(img_file, v0, v1, t0, t1, t_max) :

    global X0, Y0, X1, Y1, Z0, Z1, T0, T1, V0, V1, NX, NY, PX, A_T2X, A_X2T, A_Y2V

    print("Processing file "+img_file)

    X0 = -1; Y0 = -1; X1 = -1; Y1 = -1
    V0 = v0; V1 = v1; T0 = t0; T1 = t1

    img = Image.open(img_file)
    NX = img.size[0]
    NY = img.size[1]

    PX = img.load()

    print("Width = "+str(NX)+" pixels, height = "+str(NY)+" pixels")

    for x in range(NX) :
        for y in range(NY) :
            if (is_yellow(x,y)) :
                print("Yellow pixel at ("+str(x)+","+str(y)+")")
                if (Y1 == -1) : Y1 = y
                elif (Y0 == -1) : Y0 = y
                elif (X0 == -1) : X0 = x; Z0 = y
                elif (X1 == -1) : X1 = x; Z1 = y

    if (Y1 > Y0) :
        y = Y1
        Y1 = Y0
        Y0 = y

    A_T2X = (X1-X0)/(T1-T0)
```

```

A_X2T = (T1-T0)/(X1-X0)
A_Y2V = (V1-V0)/(Y1-Y0)

segments = []
for t in range(1,t_max) :
    x_low = t2x(t+MARGIN);
    x_hi = t2x(t+1-MARGIN);
    segment = calc_segment(t,x_low,x_hi)
    segments.append(segment)
    print([t,segment])

value = []

v_est = y2v(Z0)
value.append([1,1,v_est,0,v_est,v_est])

for t in range(1,t_max-1) :
    x = t2x(t+1)
    [a,b] = segments[t-1]
    [c,d] = segments[t]
    v_left = y2v(a*x+b)
    v_right = y2v(c*x+d)
    v_mid = (v_left+v_right)/2
    if abs(a-c) > 0.01 :
        v_est = y2v(a*(d-b)/(a-c) + b)
        t_est = x2t((d-b)/(a-c))
    else :
        v_est = v_mid
        t_est = t
    value.append([t+1,t_est,v_est,v_left,v_right,v_mid])

v_est = y2v(Z1)
value.append([t_max,t_max,v_est,v_est,0,v_est])

return value

def t2x(t) : return int(round(X0+(t-T0)*A_T2X,0))
def y2v(y) : return V0+(y-Y0)*A_Y2V
def x2t(x) : return T0+(x-X0)*A_X2T

def calc_segment(t,x_lo,x_hi) :
    x_left = []
    y_left = []
    x_right = []
    y_right = []
    x_up = []
    y_up = []
    x_down = []
    y_down = []
    for x in range(x_lo+1, x_hi) :
        for y in range(1, NY-1) :
            if (is_red(x,y)) :
                left = is_white(x-1,y-1) or is_white(x-1,y) or is_white(x-1,y+1)
                right = is_white(x+1,y-1) or is_white(x+1,y) or is_white(x+1,y+1)
                up = is_white(x-1,y-1) or is_white(x,y-1) or is_white(x+1,y-1)
                down = is_white(x-1,y+1) or is_white(x,y+1) or is_white(x+1,y+1)
                if left and not right :
                    x_left.append(x)
                    y_left.append(y)
                elif right and not left :
                    x_right.append(x)
                    y_right.append(y)
                if up and not down :
                    x_up.append(x)
                    y_up.append(y)
                elif down and not up :
                    x_down.append(x)
                    y_down.append(y)
    if min(len(x_left),len(x_right)) >= min(len(x_up), len(x_down)) :
        a1, b1 = linear_regress(x_left,y_left)
        a2, b2 = linear_regress(x_right,y_right)
    else :
        a1, b1 = linear_regress(x_up,y_up)
        a2, b2 = linear_regress(x_down,y_down)
    return [(a1+a2)/2, (b1+b2)/2]

def linear_regress(x, y) :

```

```

n = len(x)
x_bar = sum(x)/n
y_bar = sum(y)/n
sumxy = 0
sumx2 = 0
for i in range(n) :
    sumxy += (x[i]-x_bar)*(y[i]-y_bar)
    sumx2 += (x[i]-x_bar)*(x[i]-x_bar)
a = sumxy/sumx2
b = y_bar - a*x_bar
return [a,b]

def write_file(file, data) :
    output("t\tt_est\tv_est\tv_left\tv_right\tv_mid")
    for [t,t_est,v_est,v_left,v_right,v_mid] in data :
        output(str(t)+"\t"+fmtP(t_est)+"\t"+fmtP(v_est)+"\t"+fmtP(v_left)+"\t"+fmtP(v_right) \
            +"\t"+fmtP(v_mid))
    write_output(file)

def output(line) :
    lines_out.append(line+"\n")
    print(line)

def write_output(file) :
    file_out = open(file, 'w');
    file_out.writelines(lines_out)
    file_out.close()

def fmtP(P) : return '{:12.8f}'.format(P)

# Main procedure -----

chdir(DIR)

for [label, img_file, txt_file, v0, v1, t0, t1, t_max] in PARM :
    lines_out = []
    print('Processing '+label+' graph')
    data = process_image(DIR+"/"+img_file, v0, v1, t0, t1, t_max)
    write_file(DIR+"/"+txt_file, data)

# EOF

```

Annex 2. Reconstructed data using Figure 1 and Figure 2 of Kaul and Wolf's first working paper (on minors) showing also indicator variables used in logistic regression

| <i>time</i> | <i>prev</i> | <i>smokers</i> | <i>non.smokers</i> | <i>size</i> | <i>smoke.free</i> | <i>ghw</i> | <i>tax</i> | <i>pp</i> |
|-------------|-------------|----------------|--------------------|-------------|-------------------|------------|------------|-----------|
| 1           | 12.3810     | 39             | 276                | 315         | 0                 | 0          | 0          | 0         |
| 2           | 11.7825     | 39             | 292                | 331         | 0                 | 0          | 0          | 0         |
| 3           | 10.2941     | 35             | 305                | 340         | 0                 | 0          | 0          | 0         |
| 4           | 12.0548     | 44             | 321                | 365         | 0                 | 0          | 0          | 0         |
| 5           | 12.0635     | 38             | 277                | 315         | 0                 | 0          | 0          | 0         |
| 6           | 12.6935     | 41             | 282                | 323         | 0                 | 0          | 0          | 0         |
| 7           | 13.1195     | 45             | 298                | 343         | 0                 | 0          | 0          | 0         |
| 8           | 8.7209      | 30             | 314                | 344         | 0                 | 0          | 0          | 0         |
| 9           | 13.0990     | 41             | 272                | 313         | 0                 | 0          | 0          | 0         |
| 10          | 13.6201     | 38             | 241                | 279         | 0                 | 0          | 0          | 0         |
| 11          | 10.0877     | 23             | 205                | 228         | 0                 | 0          | 0          | 0         |
| 12          | 9.4395      | 32             | 307                | 339         | 0                 | 0          | 0          | 0         |
| 13          | 9.9432      | 35             | 317                | 352         | 0                 | 0          | 0          | 0         |
| 14          | 11.4754     | 42             | 324                | 366         | 0                 | 0          | 0          | 0         |
| 15          | 8.7324      | 31             | 324                | 355         | 0                 | 0          | 0          | 0         |
| 16          | 12.2699     | 40             | 286                | 326         | 0                 | 0          | 0          | 0         |
| 17          | 10.6849     | 39             | 326                | 365         | 0                 | 0          | 0          | 0         |
| 18          | 15.2231     | 58             | 323                | 381         | 0                 | 0          | 0          | 0         |
| 19          | 7.8313      | 26             | 306                | 332         | 0                 | 0          | 0          | 0         |
| 20          | 8.9888      | 32             | 324                | 356         | 0                 | 0          | 0          | 0         |
| 21          | 11.5625     | 37             | 283                | 320         | 0                 | 0          | 0          | 0         |
| 22          | 7.5988      | 25             | 304                | 329         | 0                 | 0          | 0          | 0         |
| 23          | 11.1455     | 36             | 287                | 323         | 0                 | 0          | 0          | 0         |
| 24          | 9.9010      | 30             | 273                | 303         | 0                 | 0          | 0          | 0         |
| 25          | 10.2236     | 32             | 281                | 313         | 0                 | 0          | 0          | 0         |
| 26          | 10.7843     | 33             | 273                | 306         | 0                 | 0          | 0          | 0         |
| 27          | 12.9412     | 44             | 296                | 340         | 0                 | 0          | 0          | 0         |
| 28          | 9.0909      | 29             | 290                | 319         | 0                 | 0          | 0          | 0         |
| 29          | 9.9715      | 35             | 316                | 351         | 0                 | 0          | 0          | 0         |
| 30          | 10.9091     | 36             | 294                | 330         | 0                 | 0          | 0          | 0         |
| 31          | 9.8101      | 31             | 285                | 316         | 0                 | 0          | 0          | 0         |
| 32          | 8.8328      | 28             | 289                | 317         | 0                 | 0          | 0          | 0         |
| 33          | 8.8757      | 30             | 308                | 338         | 0                 | 0          | 0          | 0         |
| 34          | 10.2894     | 32             | 279                | 311         | 0                 | 0          | 0          | 0         |
| 35          | 8.5890      | 28             | 298                | 326         | 0                 | 0          | 0          | 0         |
| 36          | 8.9172      | 28             | 286                | 314         | 0                 | 0          | 0          | 0         |
| 37          | 9.2527      | 26             | 255                | 281         | 0                 | 0          | 0          | 0         |
| 38          | 13.4483     | 39             | 251                | 290         | 0                 | 0          | 0          | 0         |
| 39          | 11.2637     | 41             | 323                | 364         | 0                 | 0          | 0          | 0         |

|    |         |    |     |     |       |   |   |   |
|----|---------|----|-----|-----|-------|---|---|---|
| 40 | 11.7021 | 33 | 249 | 282 | 0     | 0 | 0 | 0 |
| 41 | 8.1560  | 23 | 259 | 282 | 0     | 0 | 0 | 0 |
| 42 | 9.6210  | 33 | 310 | 343 | 0     | 0 | 0 | 0 |
| 43 | 7.3718  | 23 | 289 | 312 | 0     | 0 | 0 | 0 |
| 44 | 9.4463  | 29 | 278 | 307 | 0     | 0 | 0 | 0 |
| 45 | 10.2639 | 35 | 306 | 341 | 0     | 0 | 0 | 0 |
| 46 | 8.2781  | 25 | 277 | 302 | 0     | 0 | 0 | 0 |
| 47 | 7.3090  | 22 | 279 | 301 | 0     | 0 | 0 | 0 |
| 48 | 9.5385  | 31 | 294 | 325 | 0     | 0 | 0 | 0 |
| 49 | 7.8864  | 25 | 292 | 317 | 0     | 0 | 0 | 0 |
| 50 | 8.6687  | 28 | 295 | 323 | 0     | 0 | 0 | 0 |
| 51 | 8.0645  | 25 | 285 | 310 | 0     | 0 | 0 | 0 |
| 52 | 10.8696 | 35 | 287 | 322 | 0     | 0 | 0 | 0 |
| 53 | 11.8959 | 32 | 237 | 269 | 0     | 0 | 0 | 0 |
| 54 | 10.6250 | 34 | 286 | 320 | 0     | 0 | 0 | 0 |
| 55 | 11.3971 | 31 | 241 | 272 | 0     | 0 | 0 | 0 |
| 56 | 10.6061 | 28 | 236 | 264 | 0     | 0 | 0 | 0 |
| 57 | 10.4938 | 34 | 290 | 324 | 0     | 0 | 0 | 0 |
| 58 | 11.3793 | 33 | 257 | 290 | 0     | 0 | 0 | 0 |
| 59 | 13.1387 | 36 | 238 | 274 | 0     | 0 | 0 | 0 |
| 60 | 7.6190  | 24 | 291 | 315 | 0     | 0 | 0 | 0 |
| 61 | 8.4806  | 24 | 259 | 283 | 0.024 | 0 | 0 | 0 |
| 62 | 9.4708  | 34 | 325 | 359 | 0.024 | 0 | 0 | 0 |
| 63 | 9.4937  | 30 | 286 | 316 | 0.024 | 1 | 0 | 0 |
| 64 | 9.0301  | 27 | 272 | 299 | 0.024 | 1 | 0 | 0 |
| 65 | 9.3484  | 33 | 320 | 353 | 0.024 | 1 | 0 | 0 |
| 66 | 11.4379 | 35 | 271 | 306 | 0.024 | 1 | 0 | 0 |
| 67 | 6.7114  | 20 | 278 | 298 | 0.220 | 1 | 0 | 0 |
| 68 | 9.3023  | 28 | 273 | 301 | 0.320 | 1 | 0 | 0 |
| 69 | 12.8852 | 46 | 311 | 357 | 0.320 | 1 | 0 | 0 |
| 70 | 9.3458  | 30 | 291 | 321 | 0.320 | 1 | 0 | 0 |
| 71 | 5.9480  | 16 | 253 | 269 | 0.320 | 1 | 0 | 0 |
| 72 | 8.1081  | 24 | 272 | 296 | 0.336 | 1 | 0 | 0 |
| 73 | 10.7280 | 28 | 233 | 261 | 0.336 | 1 | 0 | 0 |
| 74 | 8.7786  | 23 | 239 | 262 | 0.336 | 1 | 0 | 0 |
| 75 | 5.9480  | 16 | 253 | 269 | 0.336 | 1 | 0 | 0 |
| 76 | 8.1633  | 24 | 270 | 294 | 0.336 | 1 | 0 | 0 |
| 77 | 10.0372 | 27 | 242 | 269 | 0.336 | 1 | 0 | 0 |
| 78 | 7.2519  | 19 | 243 | 262 | 0.336 | 1 | 0 | 0 |
| 79 | 11.1588 | 26 | 207 | 233 | 0.914 | 1 | 0 | 0 |
| 80 | 8.7558  | 19 | 198 | 217 | 0.914 | 1 | 0 | 0 |
| 81 | 9.2593  | 20 | 196 | 216 | 0.914 | 1 | 0 | 0 |
| 82 | 4.1096  | 9  | 210 | 219 | 0.914 | 1 | 0 | 0 |
| 83 | 8.3665  | 21 | 230 | 251 | 0.990 | 1 | 0 | 0 |
| 84 | 7.1146  | 18 | 235 | 253 | 0.990 | 1 | 0 | 0 |

|     |         |    |     |     |       |   |   |   |
|-----|---------|----|-----|-----|-------|---|---|---|
| 85  | 8.9362  | 21 | 214 | 235 | 0.990 | 1 | 0 | 0 |
| 86  | 9.4650  | 23 | 220 | 243 | 0.990 | 1 | 0 | 0 |
| 87  | 8.5409  | 24 | 257 | 281 | 0.990 | 1 | 0 | 0 |
| 88  | 4.3290  | 10 | 221 | 231 | 0.990 | 1 | 0 | 0 |
| 89  | 7.2727  | 16 | 204 | 220 | 0.990 | 1 | 0 | 0 |
| 90  | 3.8462  | 8  | 200 | 208 | 0.990 | 1 | 0 | 0 |
| 91  | 7.9167  | 19 | 221 | 240 | 0.990 | 1 | 0 | 0 |
| 92  | 8.2524  | 17 | 189 | 206 | 0.990 | 1 | 0 | 0 |
| 93  | 9.1667  | 22 | 218 | 240 | 0.990 | 1 | 0 | 0 |
| 94  | 8.1731  | 17 | 191 | 208 | 0.990 | 1 | 0 | 0 |
| 95  | 6.5116  | 14 | 201 | 215 | 0.990 | 1 | 0 | 0 |
| 96  | 8.0717  | 18 | 205 | 223 | 0.990 | 1 | 0 | 0 |
| 97  | 7.4534  | 12 | 149 | 161 | 0.990 | 1 | 0 | 0 |
| 98  | 6.4039  | 13 | 190 | 203 | 0.990 | 1 | 0 | 0 |
| 99  | 5.5046  | 12 | 206 | 218 | 0.990 | 1 | 0 | 0 |
| 100 | 7.2650  | 17 | 217 | 234 | 0.990 | 1 | 0 | 0 |
| 101 | 8.0717  | 18 | 205 | 223 | 0.990 | 1 | 0 | 0 |
| 102 | 5.9633  | 13 | 205 | 218 | 0.990 | 1 | 0 | 0 |
| 103 | 7.8431  | 16 | 188 | 204 | 0.990 | 1 | 0 | 0 |
| 104 | 6.9124  | 15 | 202 | 217 | 0.990 | 1 | 0 | 0 |
| 105 | 8.6957  | 18 | 189 | 207 | 0.990 | 1 | 0 | 0 |
| 106 | 8.3333  | 17 | 187 | 204 | 0.990 | 1 | 0 | 0 |
| 107 | 6.0000  | 12 | 188 | 200 | 0.990 | 1 | 0 | 0 |
| 108 | 7.4766  | 16 | 198 | 214 | 0.990 | 1 | 0 | 0 |
| 109 | 6.7797  | 12 | 165 | 177 | 0.990 | 1 | 0 | 0 |
| 110 | 10.6599 | 21 | 176 | 197 | 0.990 | 1 | 0 | 0 |
| 111 | 8.3333  | 16 | 176 | 192 | 0.990 | 1 | 0 | 0 |
| 112 | 6.4327  | 11 | 160 | 171 | 0.990 | 1 | 0 | 0 |
| 113 | 7.2464  | 15 | 192 | 207 | 0.990 | 1 | 1 | 0 |
| 114 | 7.7720  | 15 | 178 | 193 | 0.990 | 1 | 1 | 0 |
| 115 | 10.1523 | 20 | 177 | 197 | 1     | 1 | 1 | 0 |
| 116 | 6.3348  | 14 | 207 | 221 | 1     | 1 | 1 | 0 |
| 117 | 7.7626  | 17 | 202 | 219 | 1     | 1 | 1 | 0 |
| 118 | 7.3913  | 17 | 213 | 230 | 1     | 1 | 1 | 0 |
| 119 | 8.3333  | 16 | 176 | 192 | 1     | 1 | 1 | 0 |
| 120 | 7.5893  | 17 | 207 | 224 | 1     | 1 | 1 | 0 |
| 121 | 12.7168 | 22 | 151 | 173 | 1     | 1 | 1 | 0 |
| 122 | 12.2449 | 24 | 172 | 196 | 1     | 1 | 1 | 0 |
| 123 | 5.4187  | 11 | 192 | 203 | 1     | 1 | 1 | 0 |
| 124 | 7.0652  | 13 | 171 | 184 | 1     | 1 | 1 | 0 |
| 125 | 5.6338  | 12 | 201 | 213 | 1     | 1 | 1 | 0 |
| 126 | 10.0478 | 21 | 188 | 209 | 1     | 1 | 1 | 0 |
| 127 | 10.1695 | 18 | 159 | 177 | 1     | 1 | 1 | 0 |
| 128 | 10.3261 | 19 | 165 | 184 | 1     | 1 | 1 | 0 |
| 129 | 4.9808  | 13 | 248 | 261 | 1     | 1 | 1 | 0 |

|     |         |    |     |     |   |   |   |   |
|-----|---------|----|-----|-----|---|---|---|---|
| 130 | 11.5578 | 23 | 176 | 199 | 1 | 1 | 1 | 0 |
| 131 | 5.6701  | 11 | 183 | 194 | 1 | 1 | 1 | 0 |
| 132 | 7.5000  | 15 | 185 | 200 | 1 | 1 | 1 | 0 |
| 133 | 7.8431  | 16 | 188 | 204 | 1 | 1 | 1 | 0 |
| 134 | 3.6885  | 9  | 235 | 244 | 1 | 1 | 1 | 0 |
| 135 | 3.7915  | 8  | 203 | 211 | 1 | 1 | 1 | 0 |
| 136 | 5.7692  | 12 | 196 | 208 | 1 | 1 | 1 | 0 |
| 137 | 6.2016  | 16 | 242 | 258 | 1 | 1 | 1 | 0 |
| 138 | 6.4885  | 17 | 245 | 262 | 1 | 1 | 1 | 0 |
| 139 | 4.3307  | 11 | 243 | 254 | 1 | 1 | 1 | 0 |
| 140 | 8.5837  | 20 | 213 | 233 | 1 | 1 | 1 | 0 |
| 141 | 5.5319  | 13 | 222 | 235 | 1 | 1 | 1 | 0 |
| 142 | 3.0568  | 7  | 222 | 229 | 1 | 1 | 1 | 0 |
| 143 | 6.6116  | 16 | 226 | 242 | 1 | 1 | 1 | 1 |
| 144 | 5.5794  | 13 | 220 | 233 | 1 | 1 | 1 | 1 |
| 145 | 4.3011  | 8  | 178 | 186 | 1 | 1 | 1 | 1 |
| 146 | 7.3469  | 18 | 227 | 245 | 1 | 1 | 1 | 1 |
| 147 | 4.1199  | 11 | 256 | 267 | 1 | 1 | 1 | 1 |
| 148 | 5.8036  | 13 | 211 | 224 | 1 | 1 | 1 | 1 |
| 149 | 8.1967  | 20 | 224 | 244 | 1 | 1 | 1 | 1 |
| 150 | 6.5385  | 17 | 243 | 260 | 1 | 1 | 1 | 1 |
| 151 | 4.4355  | 11 | 237 | 248 | 1 | 1 | 1 | 1 |
| 152 | 3.1088  | 6  | 187 | 193 | 1 | 1 | 1 | 1 |
| 153 | 5.8824  | 12 | 192 | 204 | 1 | 1 | 1 | 1 |
| 154 | 3.7037  | 7  | 182 | 189 | 1 | 1 | 1 | 1 |
| 155 | 6.1905  | 13 | 197 | 210 | 1 | 1 | 1 | 1 |
| 156 | 6.4327  | 11 | 160 | 171 | 1 | 1 | 1 | 1 |
